# Supplementary material
Source: publisher figshare collection journal article supplement (https://acs.figshare.com/ndownloader/files/13692884)
Supplement: Supplementary file 1 [file 13692884]

# Use of light-degradable aliphatic polycarbonate nanoparticles as drug carrier for photosensitizer

*Jingjiang Sun<sup>† ‖</sup>, Wolfgang Birnbaum<sup>†</sup>, Juliane Anderski<sup>‡</sup>, Marie-Theres Picker<sup>†</sup>,  
Dennis Mulac<sup>‡</sup>, Klaus Langer<sup>‡</sup>, Dirk Kuckling<sup>†\*</sup>*

<sup>†</sup>Paderborn University, Department of Chemistry, Warburger Str. 100, D-33098  
Paderborn, Germany

<sup>‡</sup>University of Münster, Institute of Pharmaceutical Technology and Biopharmacy,  
Corrensstr. 48, D-48149 Münster, Germany

<sup>‖</sup> Qingdao University of Science and Technology, School of Polymer Science and  
Engineering, Zhengzhou Rd. 53, CN-266042 Qingdao, China

## **Table of contents:**

1. Characterization of small molecules and polymers
2. Ring-opening copolymerization of **LrM** and TMC
3. Light degradation of the **LrM** followed by NMR

## 1. Characterization of small molecules and polymers

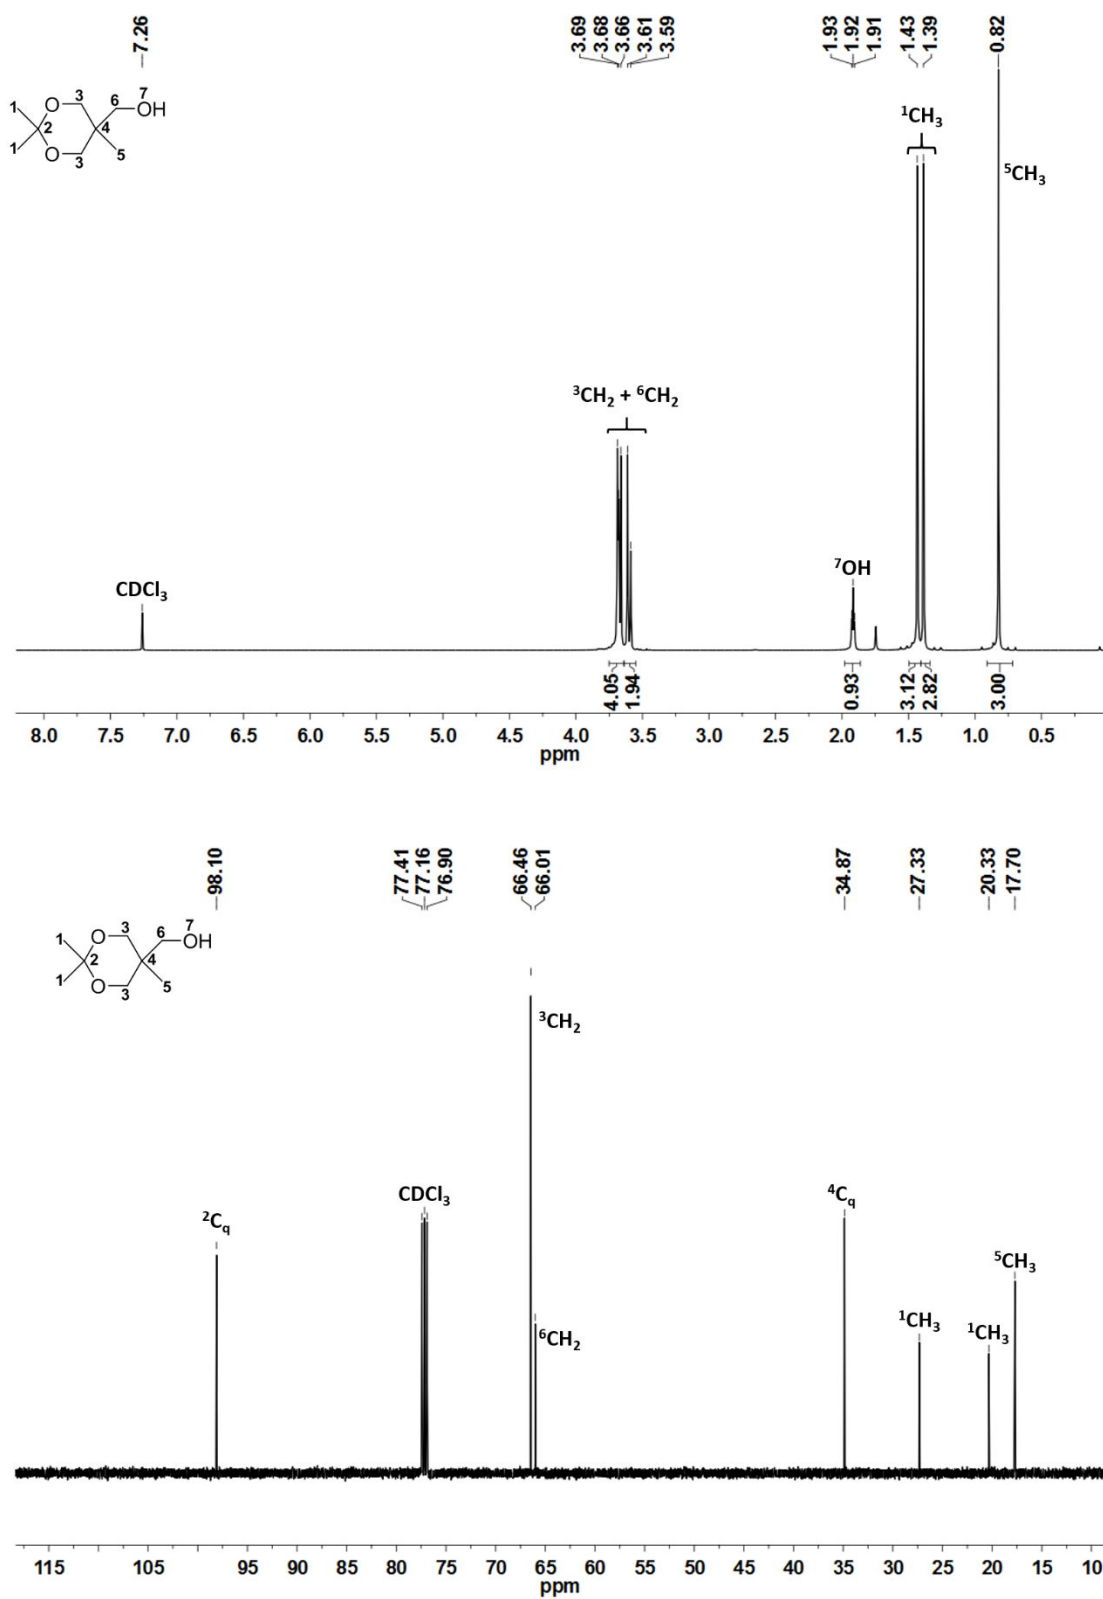

Figure S1.  $^1\text{H}$  and  $^{13}\text{C}$  NMR spectra of compound **1**

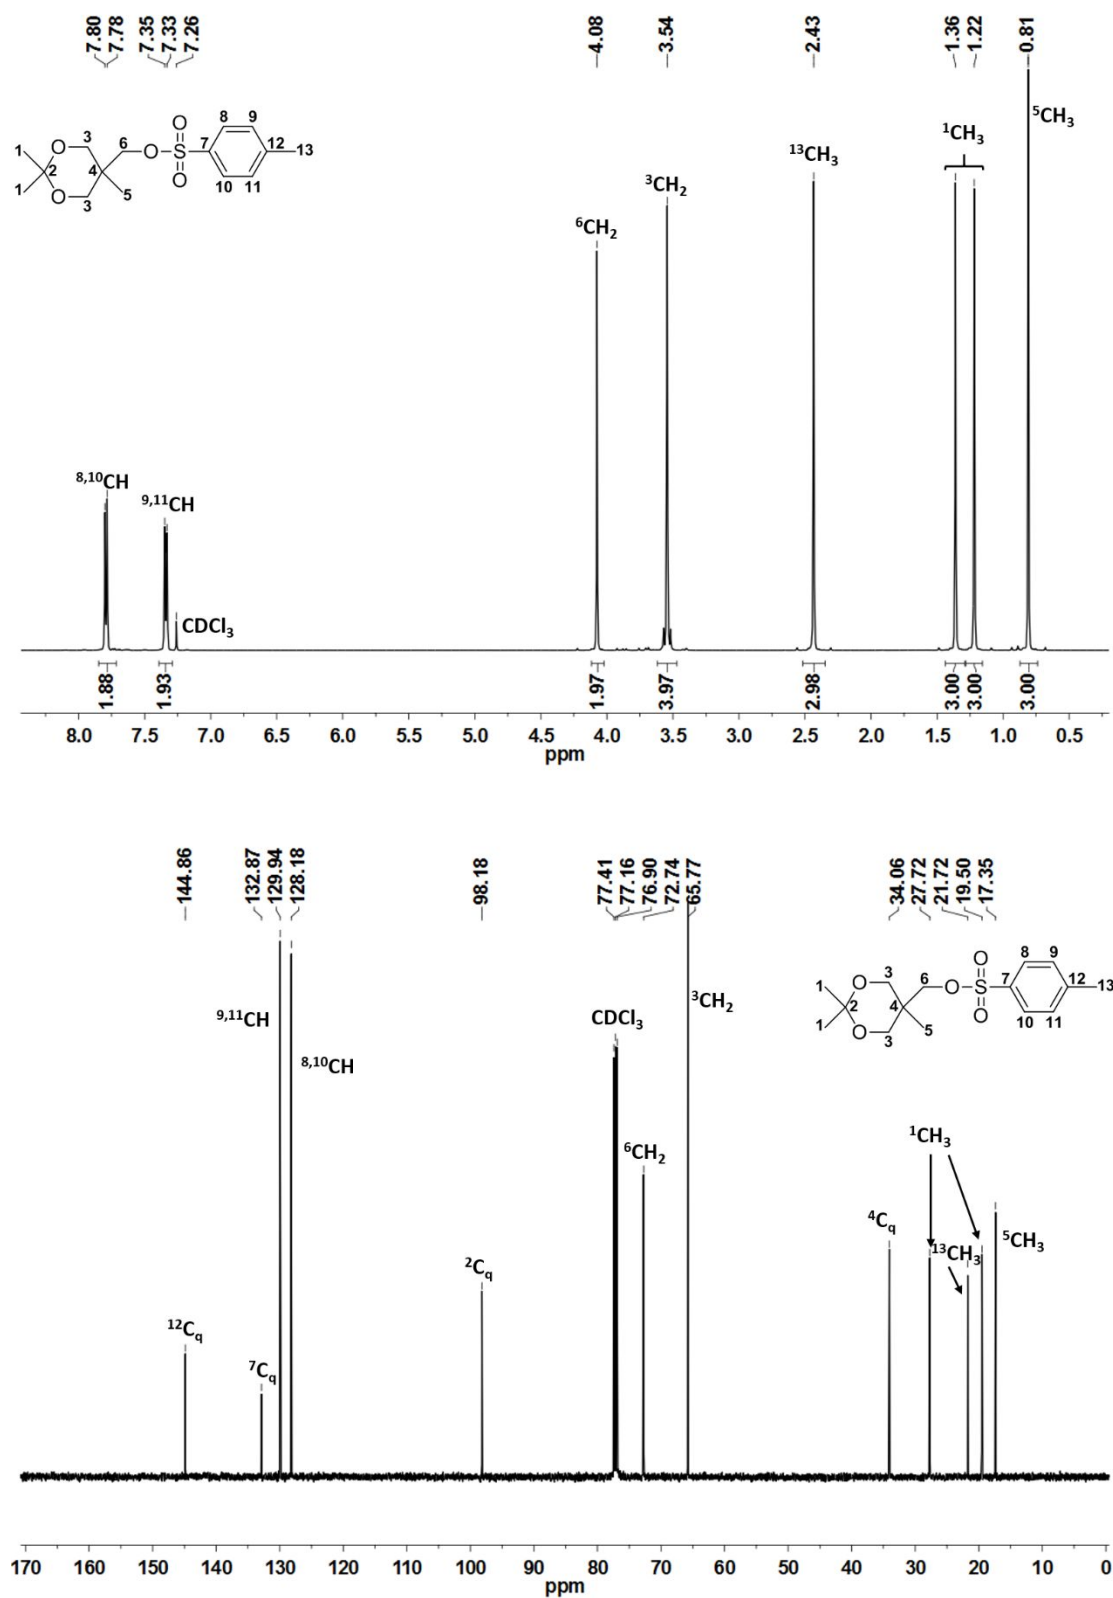

**Figure S2.** <sup>1</sup>H and <sup>13</sup>C NMR spectra of compound **2**



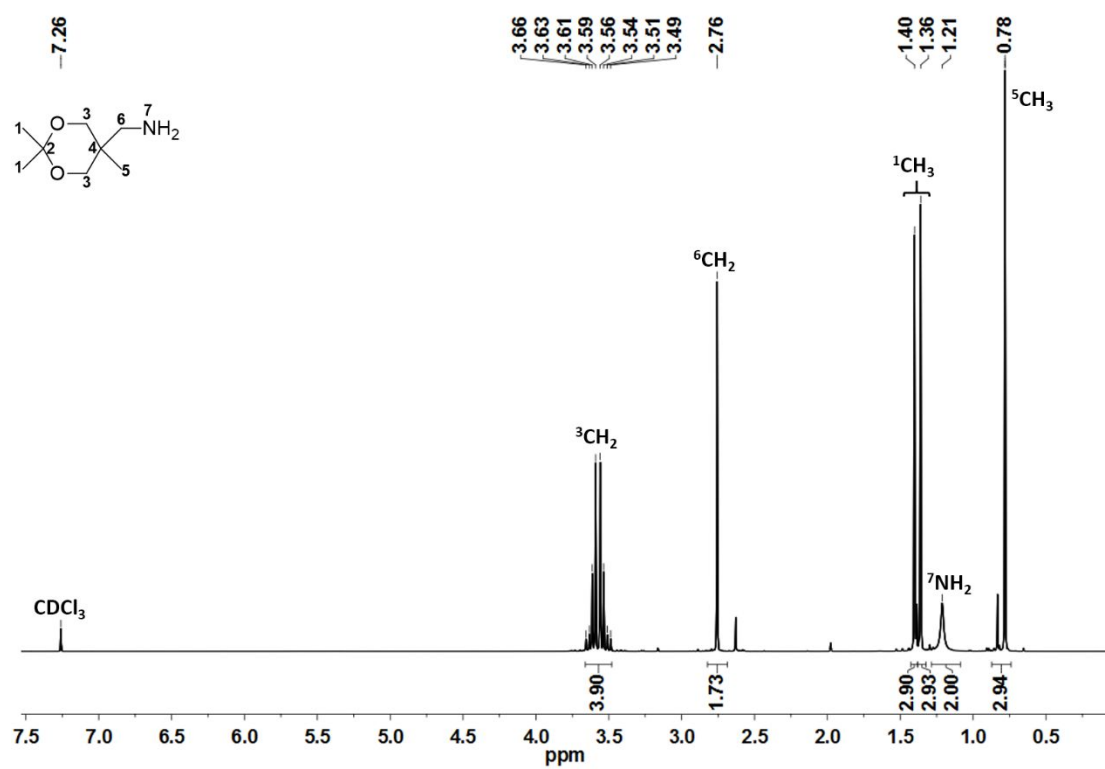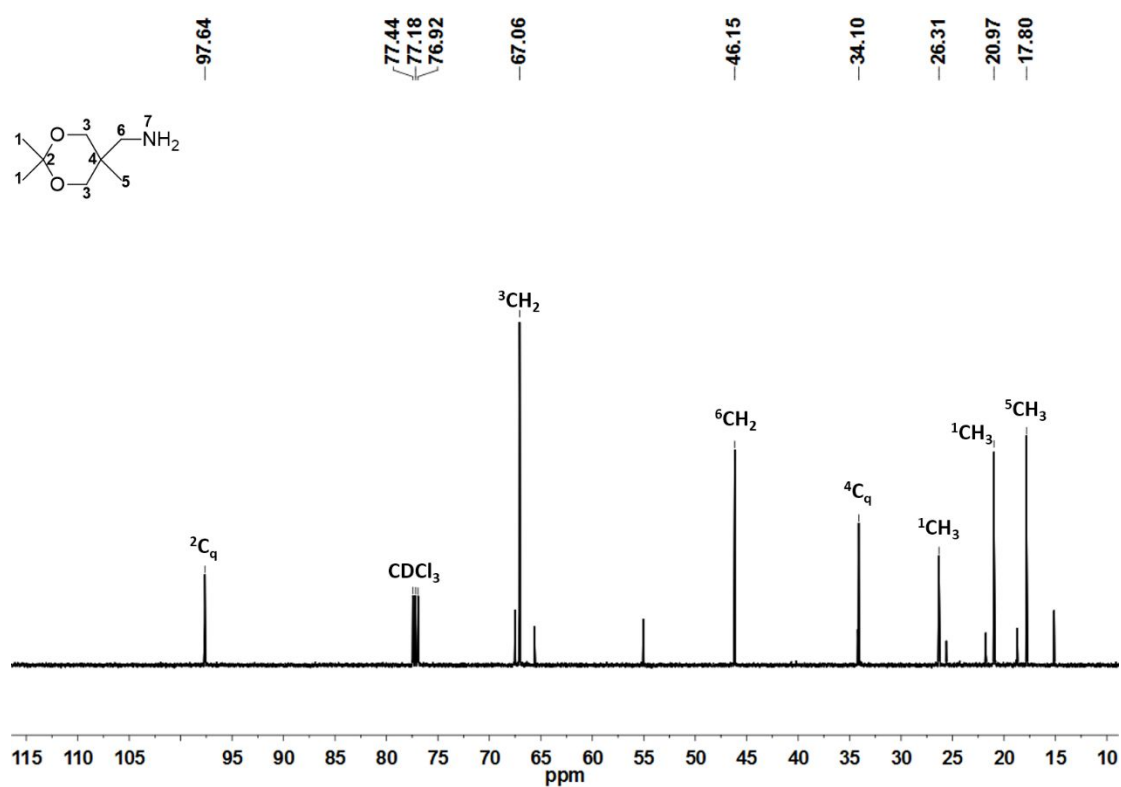

**Figure S4.** <sup>1</sup>H and <sup>13</sup>C NMR spectra of compound 4

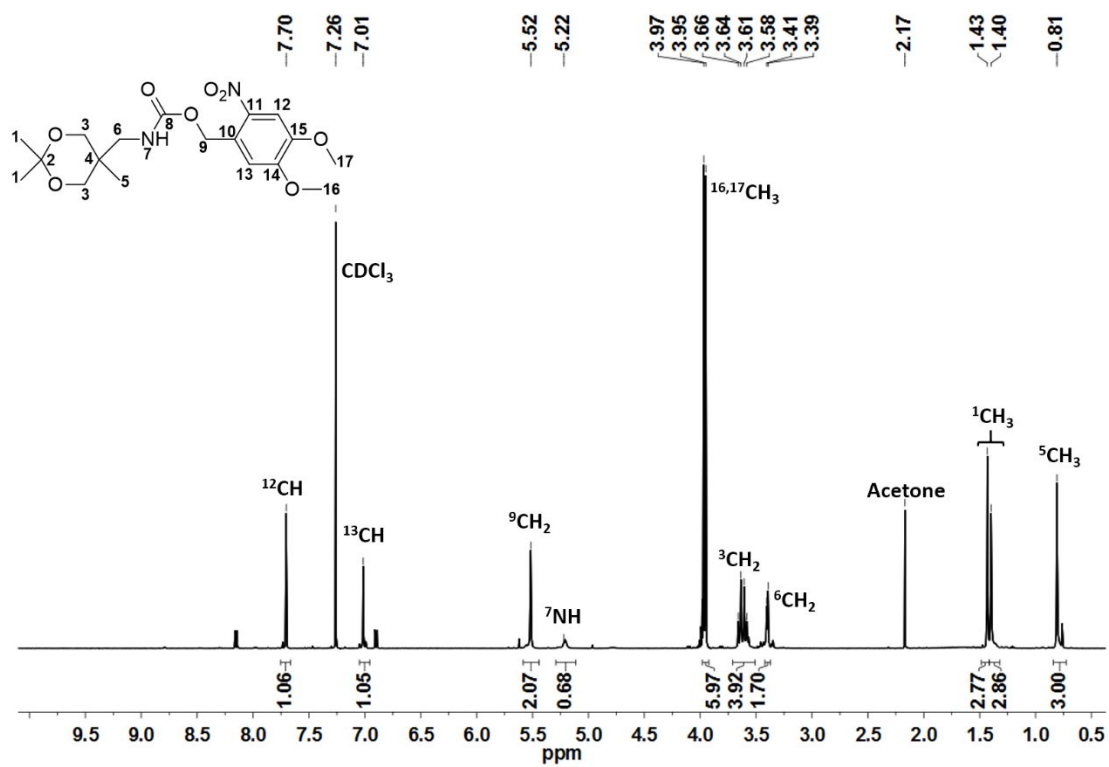

**Figure S5.** <sup>1</sup>H NMR spectrum of crude compound 5

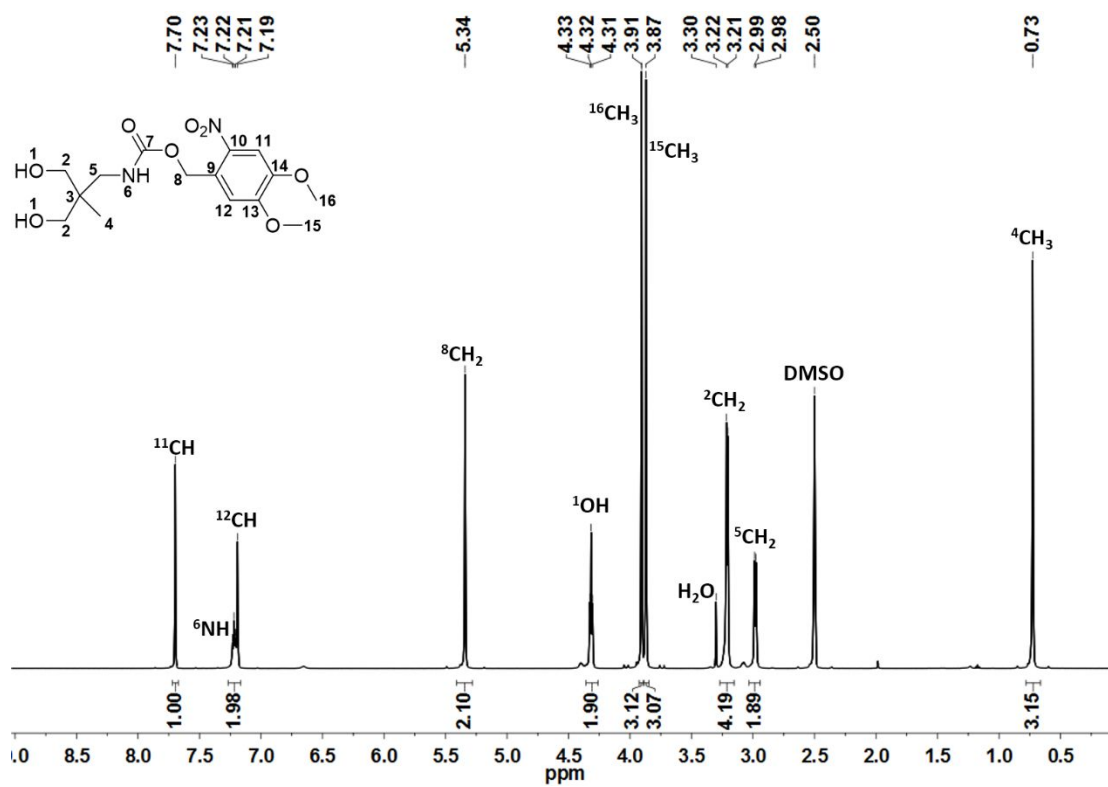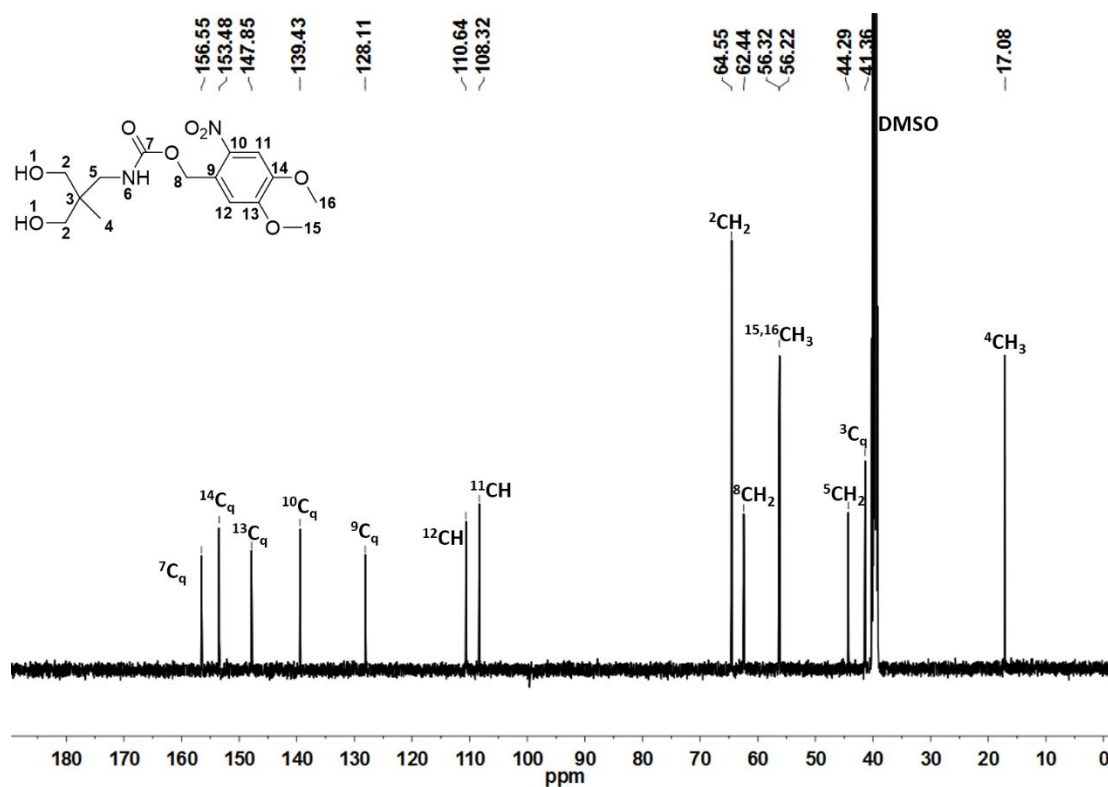

**Figure S6.** <sup>1</sup>H and <sup>13</sup>C NMR spectra of compound 6

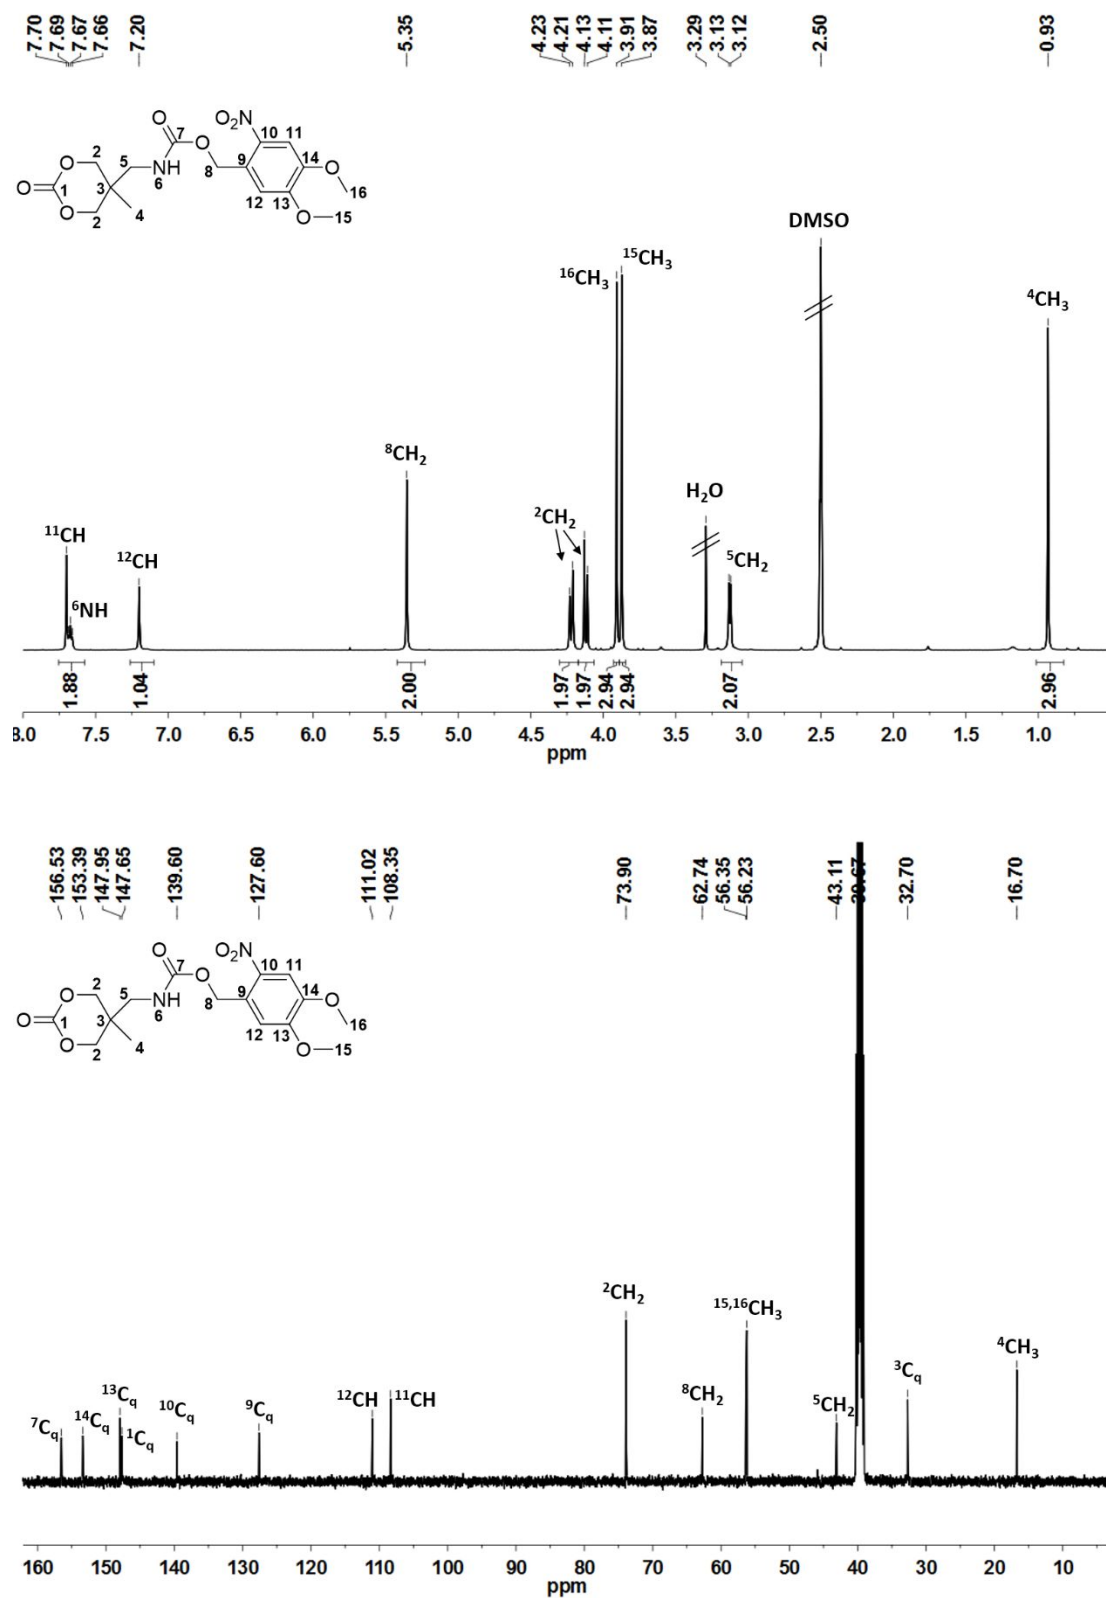

Figure S7. <sup>1</sup>H and <sup>13</sup>C NMR spectra of LrM



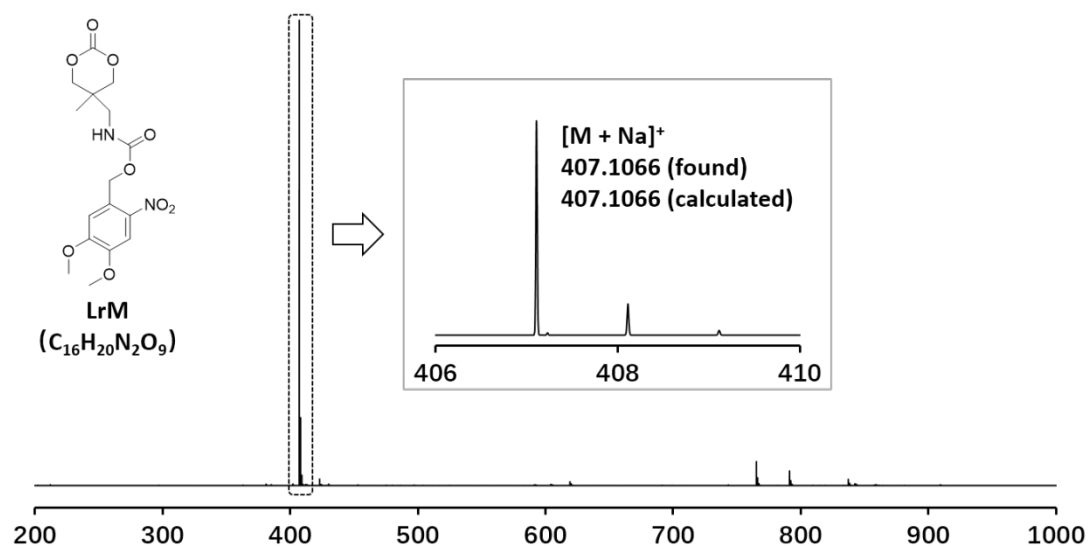

**Figure S8.** ESI-ToF mass spectrum of **LrM**

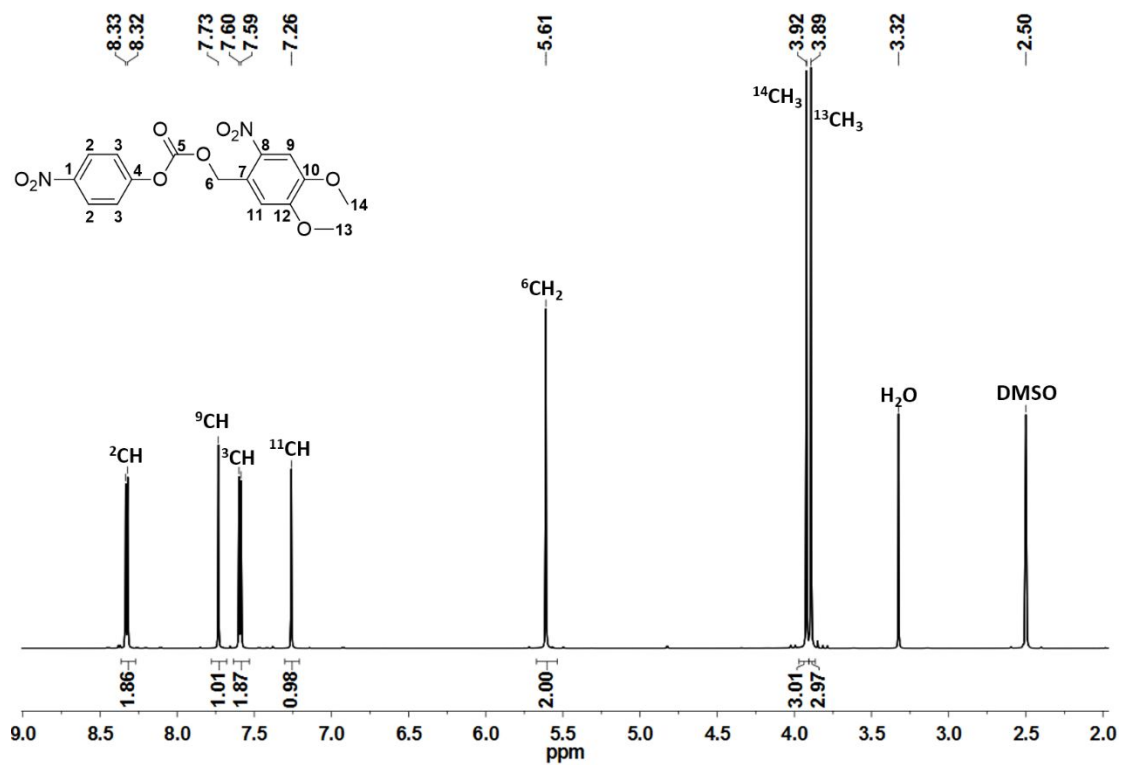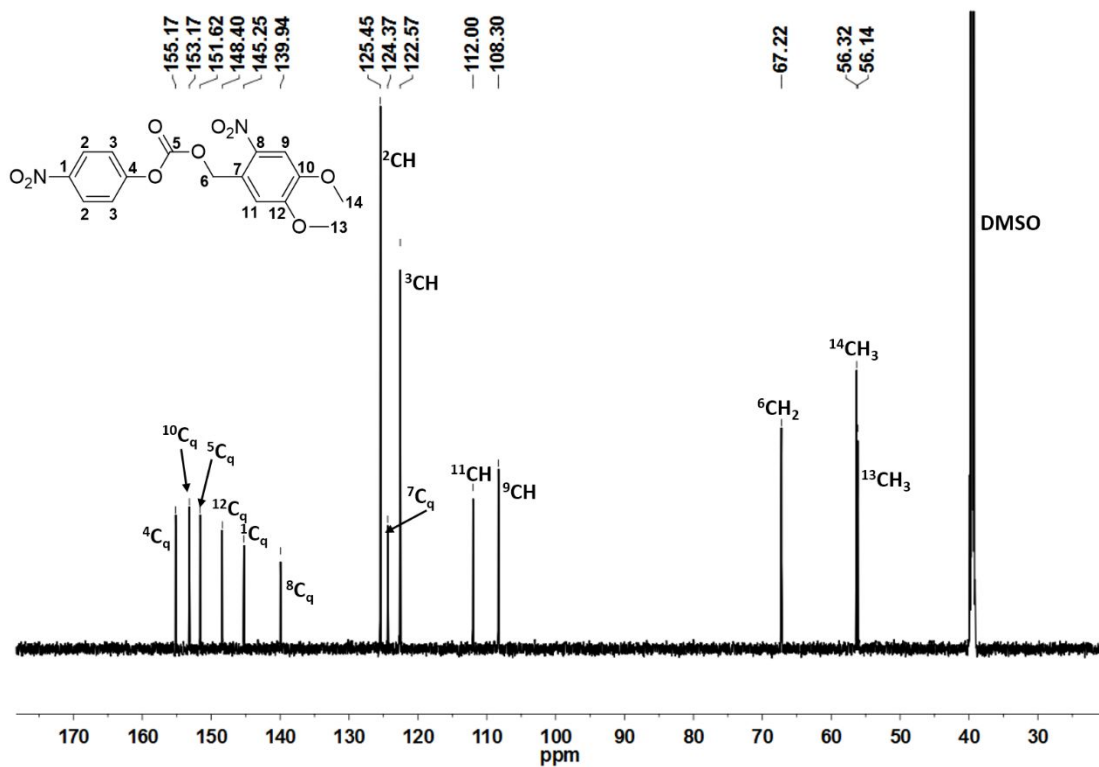

**Figure S9.** <sup>1</sup>H and <sup>13</sup>C NMR spectra of compound 7

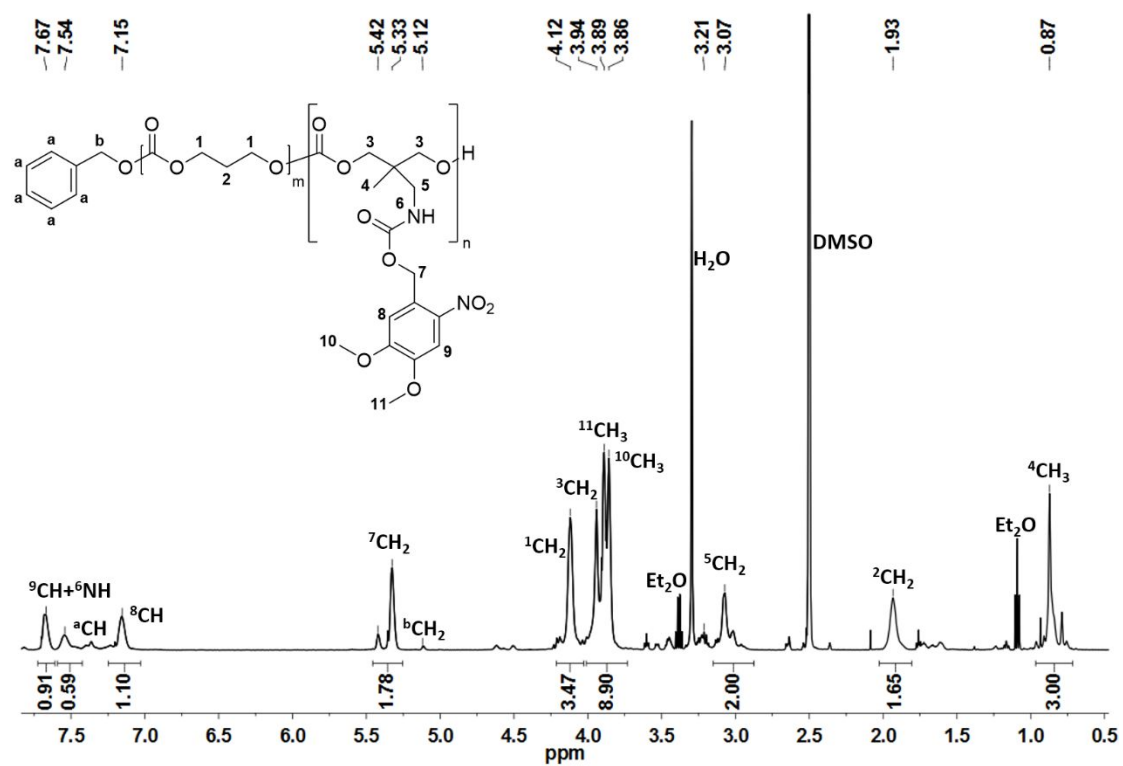

**Figure S10.** <sup>1</sup>H NMR spectrum of copolycarbonate **LrPC-2**

## 2. Ring-opening copolymerization of LrM with TMC

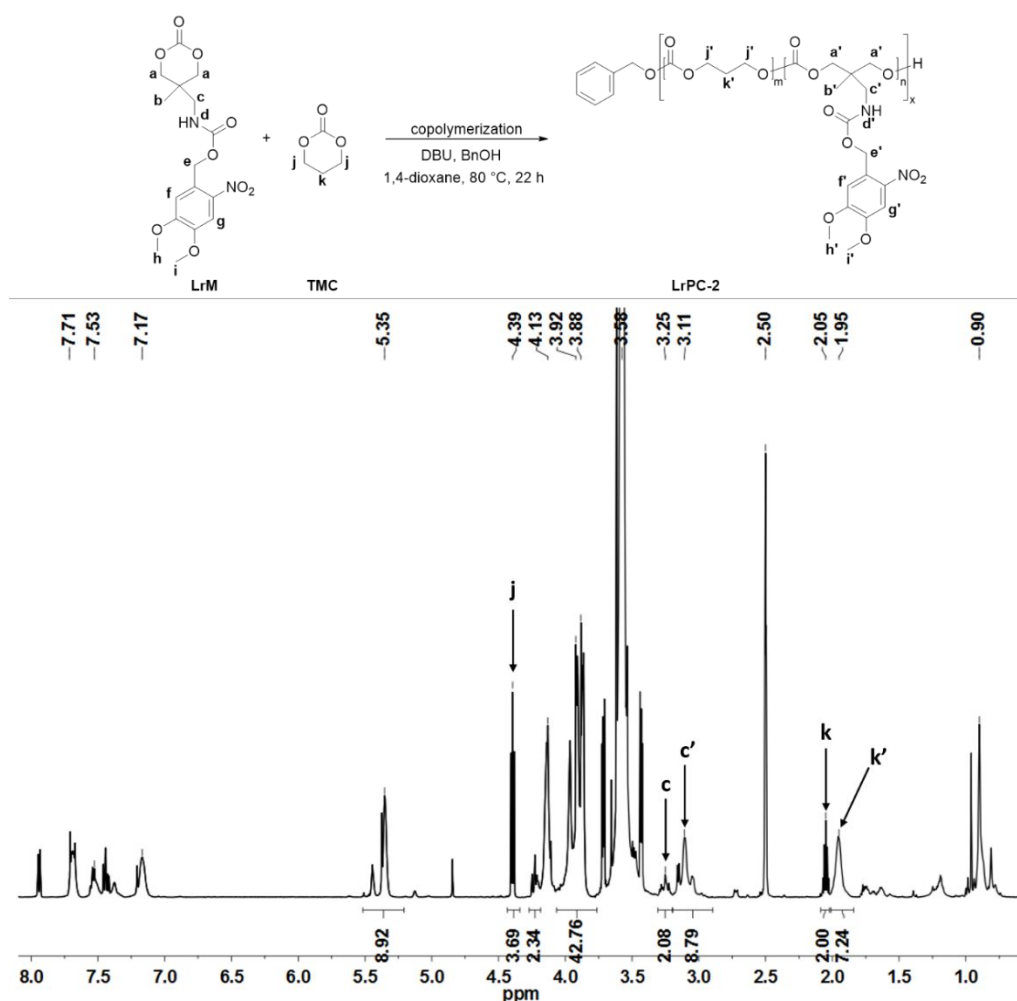

**Figure S11.** <sup>1</sup>H NMR spectrum of the sample taken out from the copolymerization mixture of **LrM** and TMC at 22 h.

### Determination of Monomer conversions by NMR spectroscopy (Figure S15)

Conversions of **LrM** and TMC were confirmed by calculation from the relative integrals of the monomer (2.05 ppm for TMC (**k**) and 3.25 ppm for **LrM** (**c**)) and copolymer (1.95 ppm for PTMC (**k'**) and 3.11 ppm for **LrPC**(**c'**)) peaks in <sup>1</sup>H NMR spectra.

$$\text{conv.}(\text{TMC}, 22 \text{ h}) = \frac{I(k)}{I(k) + I(k')} \times 100\% = \frac{7.24}{2.00 + 7.24} \times 100\% = 79\%$$

$$\text{conv.}(\text{LrM}, 22 \text{ h}) = \frac{I(c)}{I(c) + I(c')} \times 100\% = \frac{2.08}{2.08 + 8.79} \times 100\% = 81\%$$

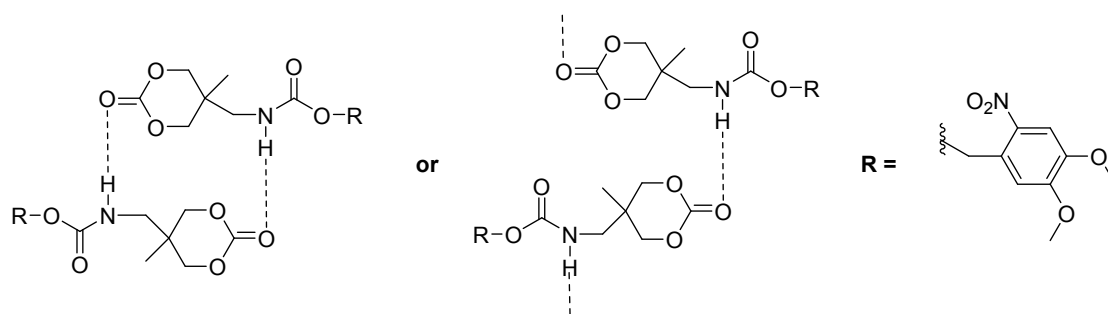

**Figure S12.** Possible intermolecular hydrogen bonding between **LrMs**

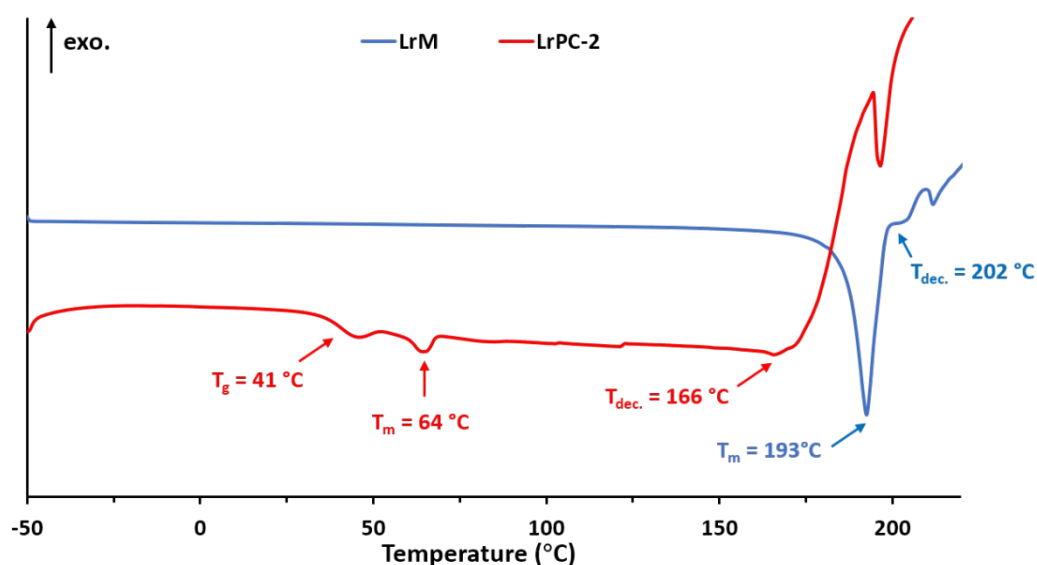

**Figure S13.** DSC traces of **LrM** and **LrPC-2** from first heating cycle at 10 °C/min

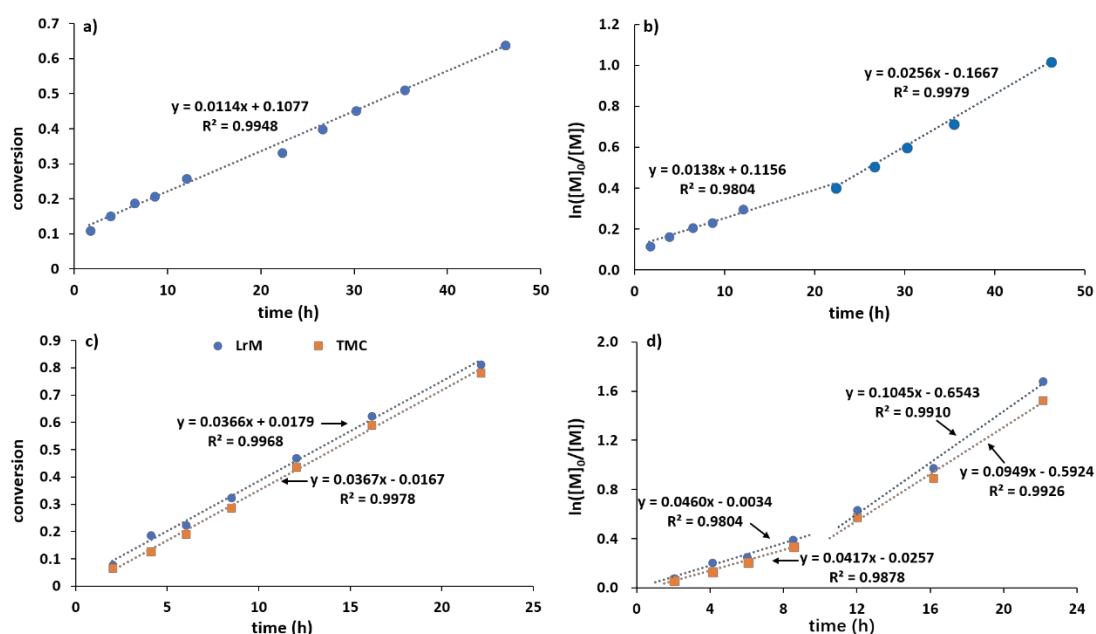

**Figure S14.** Kinetics of homopolymerization of **LrM** (a and b) and copolymerization of **LrM** with TMC (c and d) with linear equations

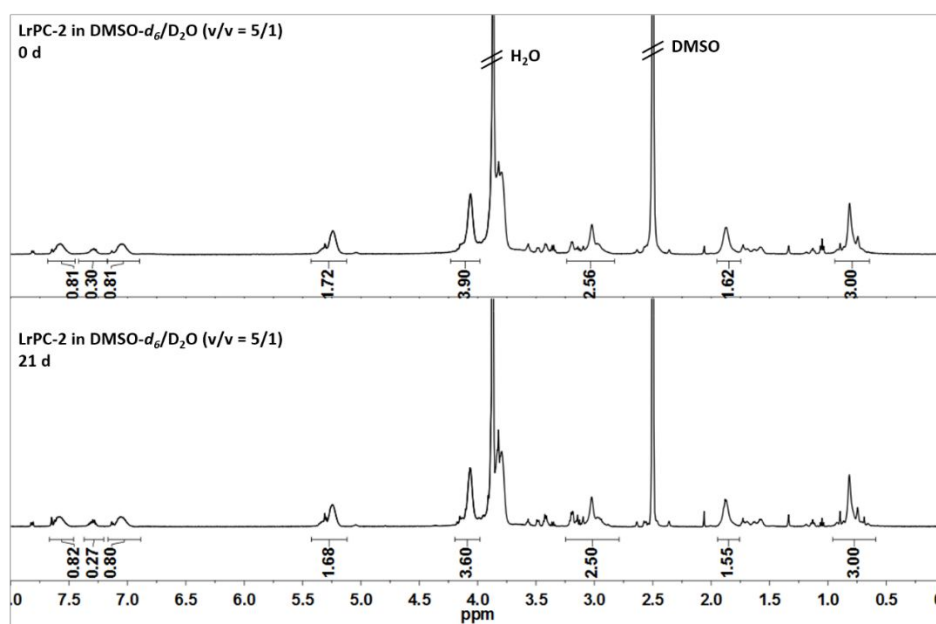

**Figure S15.**  $^1\text{H}$  NMR spectrum of LrPC-2 in DMSO/D $_2$ O after 0 day and 21 day incubation at 37 °C

### 3. Light degradation of the LrM followed by NMR

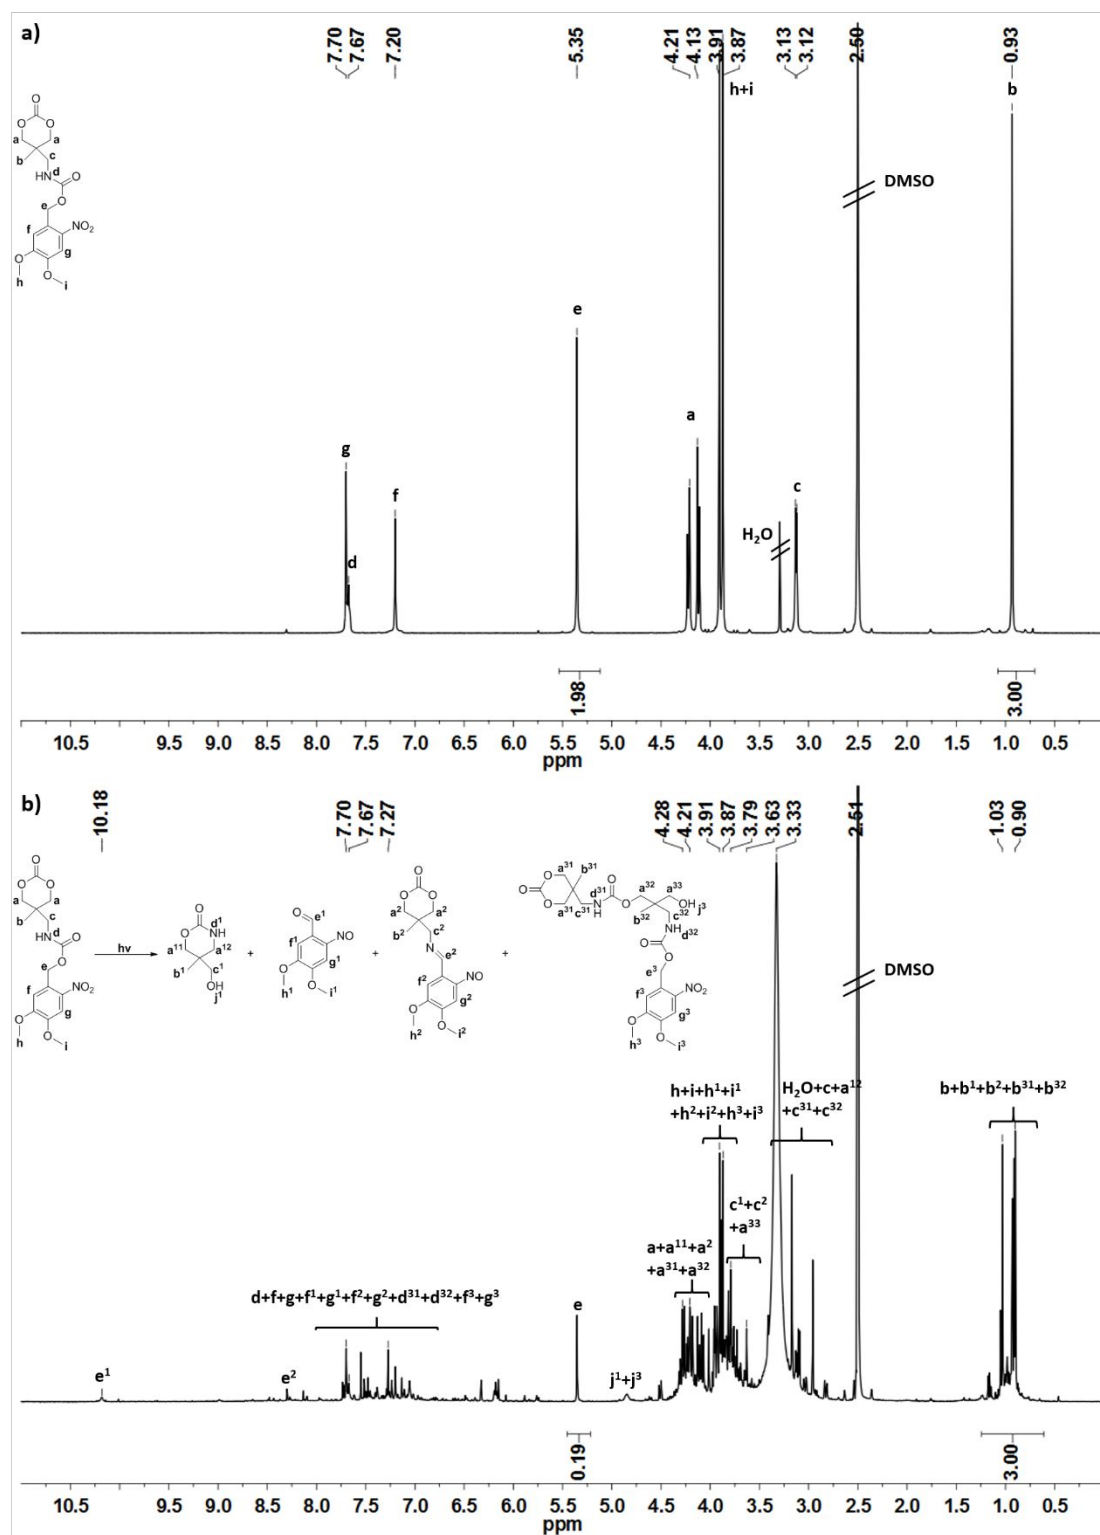

**Figure S16.**  $^1\text{H}$  NMR spectrum of LrM before (a) and after (b) irradiation for 15 min
